# Supplementary figures and images for: Gene Expression Profile Changes After Short-activating RNA-mediated Induction of Endogenous Pluripotency Factors in Human Mesenchymal Stem Cells
Source: PubMed Central journal article supplement — Mol Ther Nucleic Acids. 2012 Aug 7;1(8):e35–. doi: 10.1038/mtna.2012.20 (PMC3437803; doi:10.1038/mtna.2012.20), 2012-08-07

# Figure S1

## Labeled Oligonucleotide Transfection Efficiency

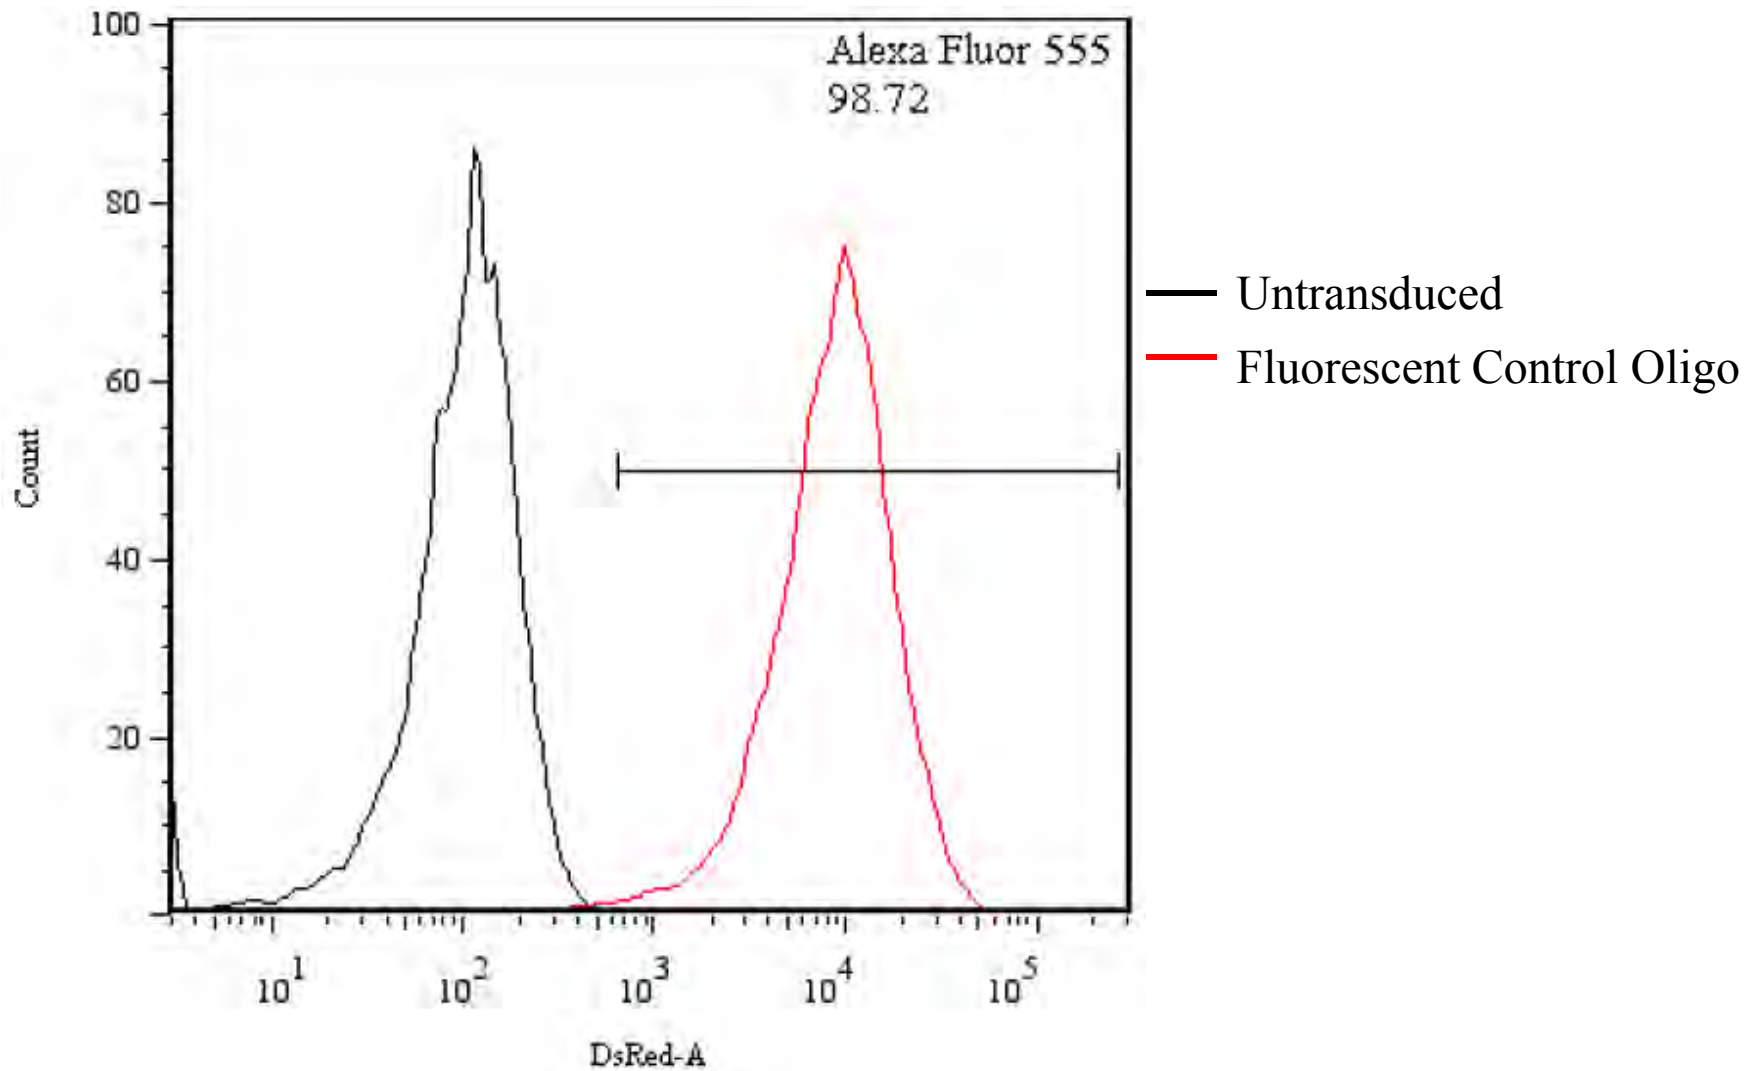

Supplement: mtna201220x1.pdf [file mtna201220x1.pdf]

# Figure S2

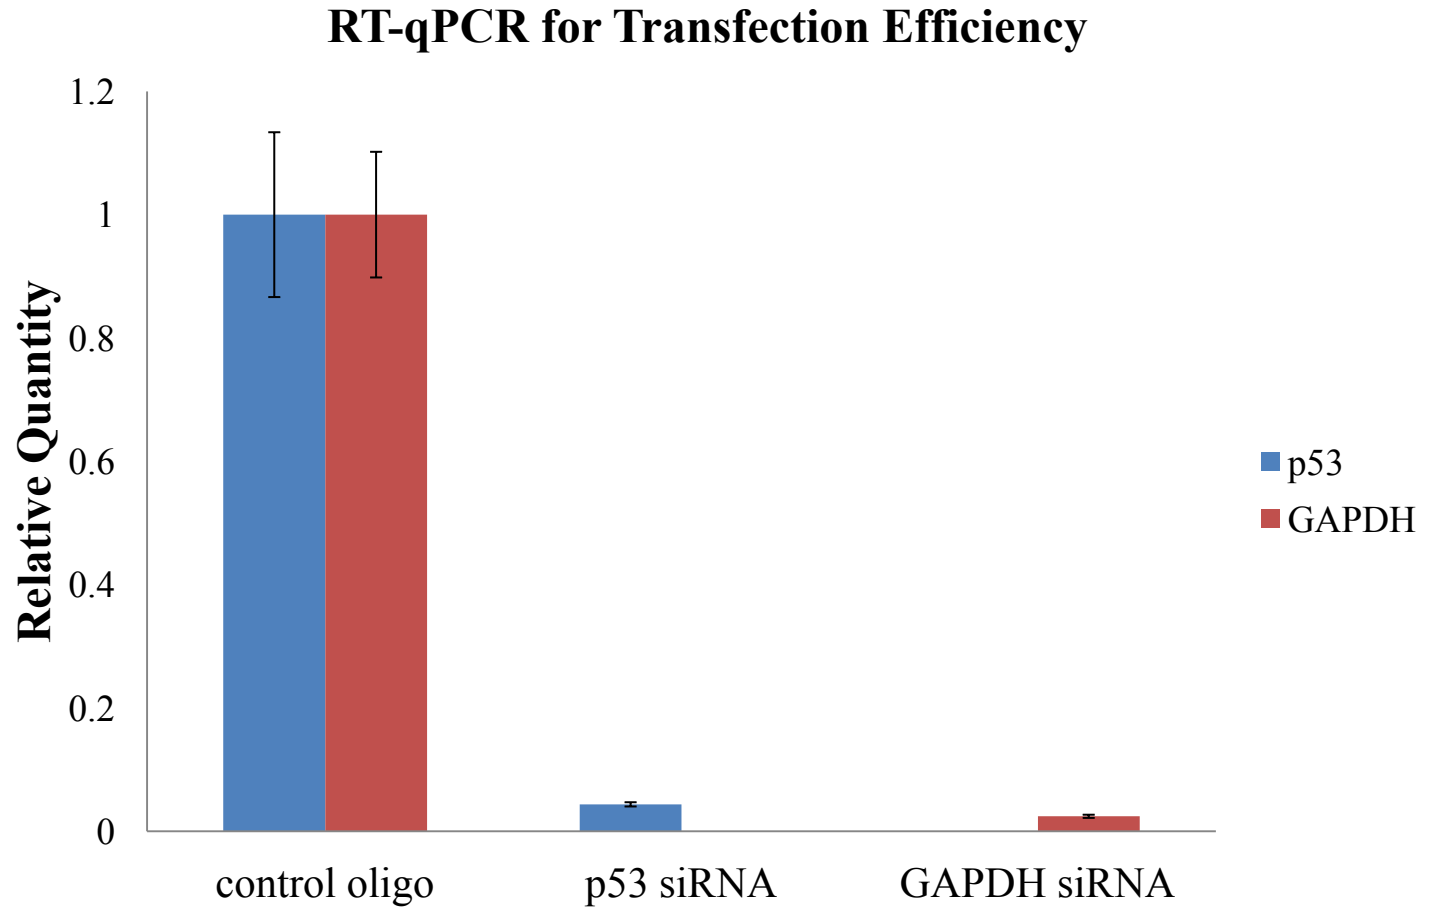

Supplement: mtna201220x2.pdf [file mtna201220x2.pdf]

Figure S3

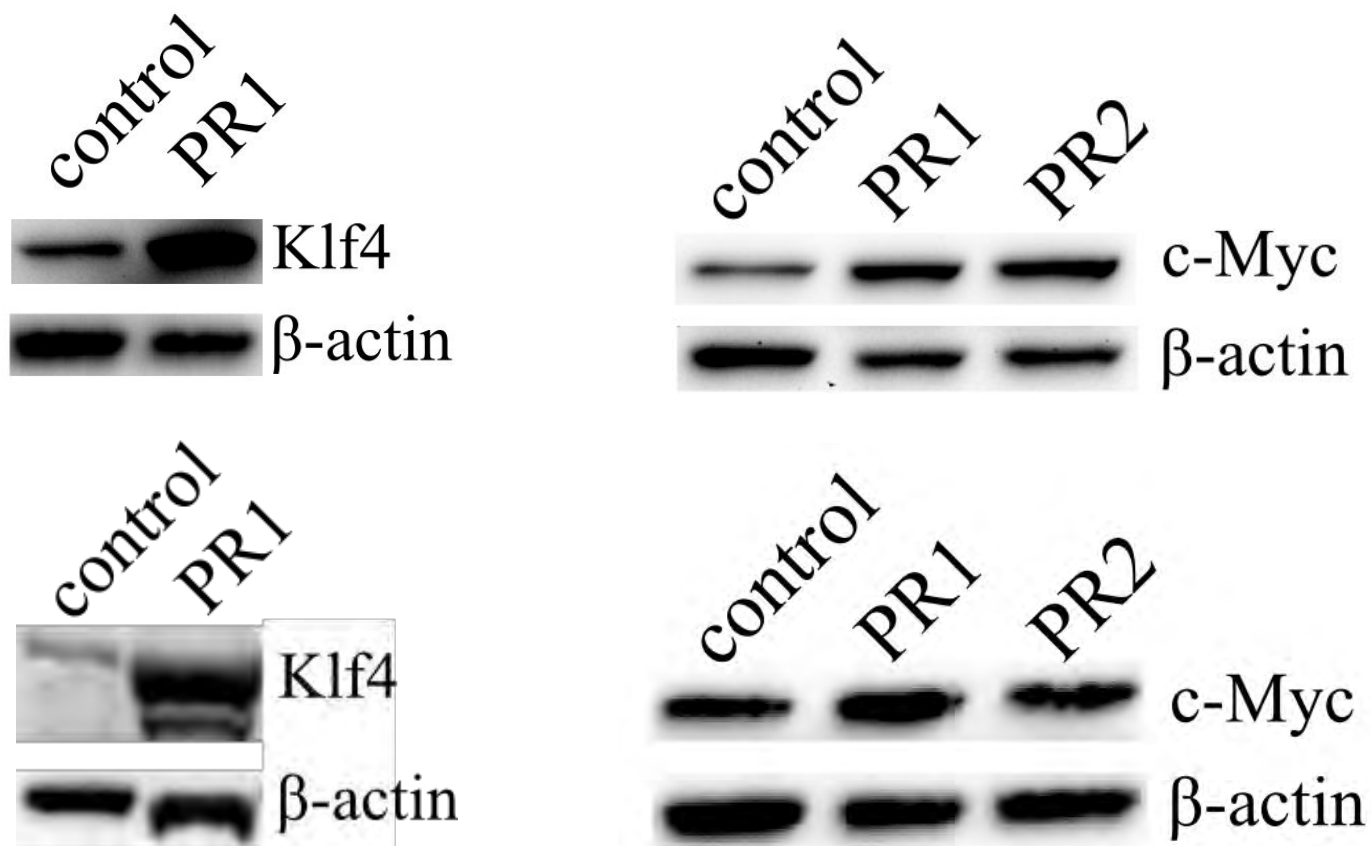

Supplement: mtna201220x3.pdf [file mtna201220x3.pdf]

# Figure S4

## RT-qPCR for Interferon Response Genes

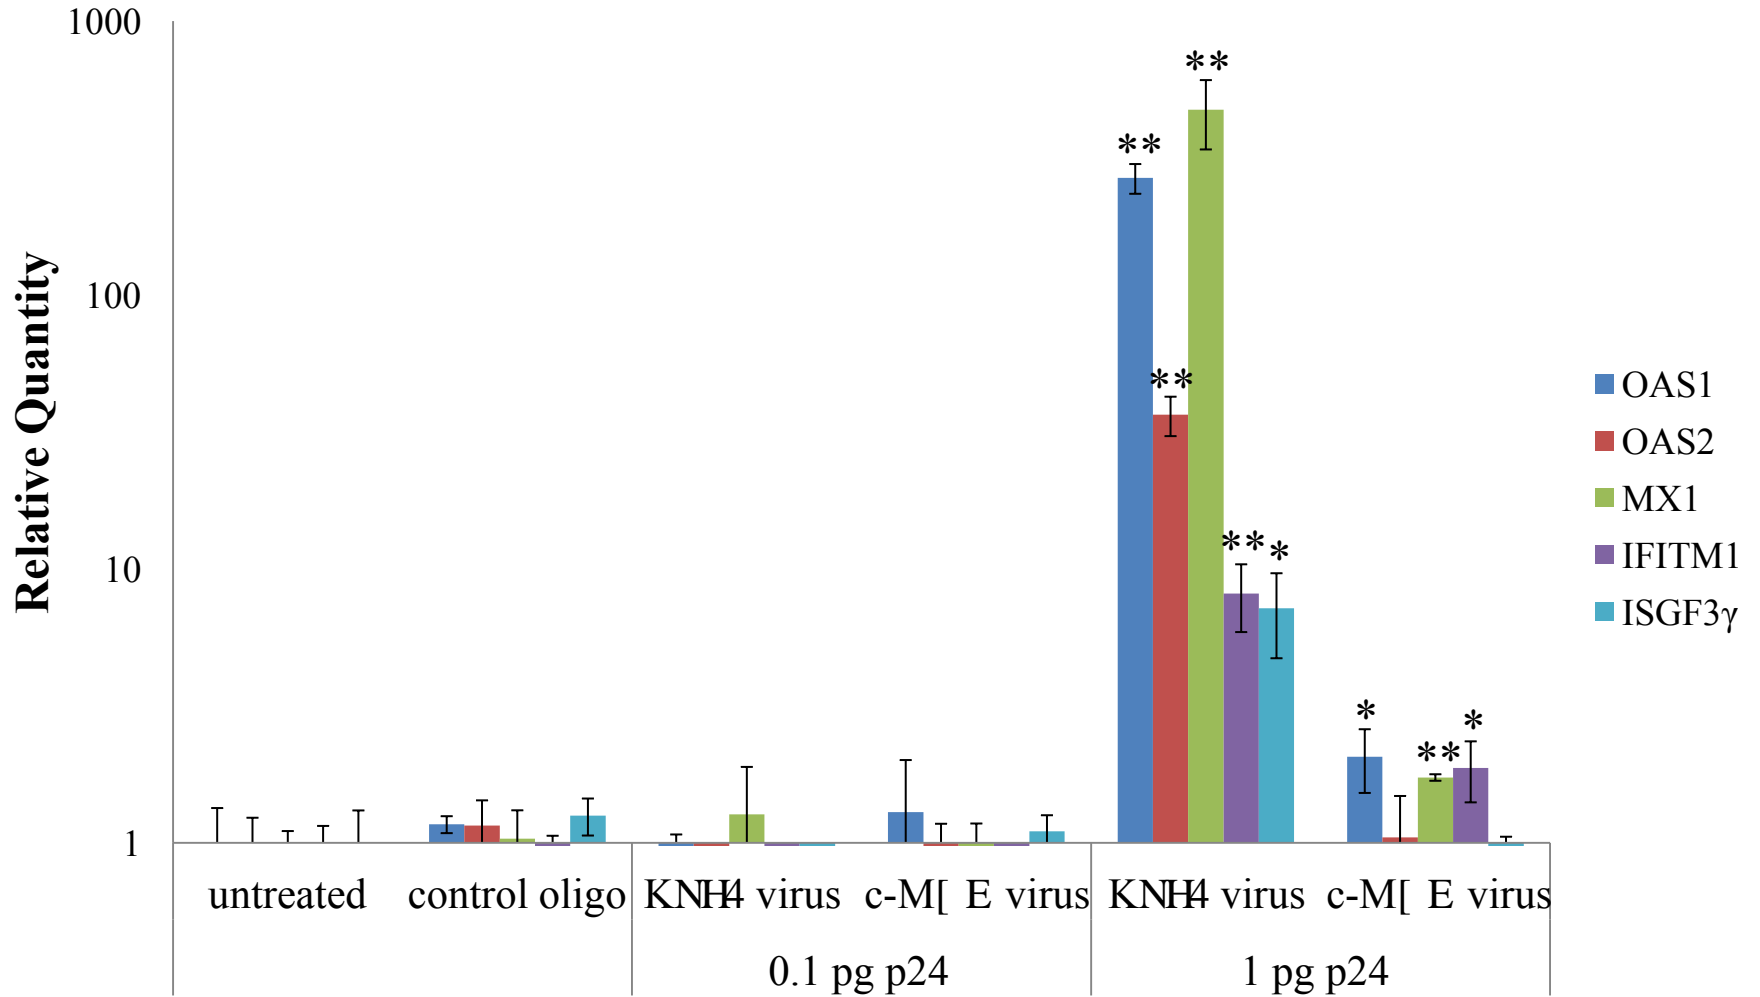

Supplement: mtna201220x4.pdf [file mtna201220x4.pdf]

# Figure S5

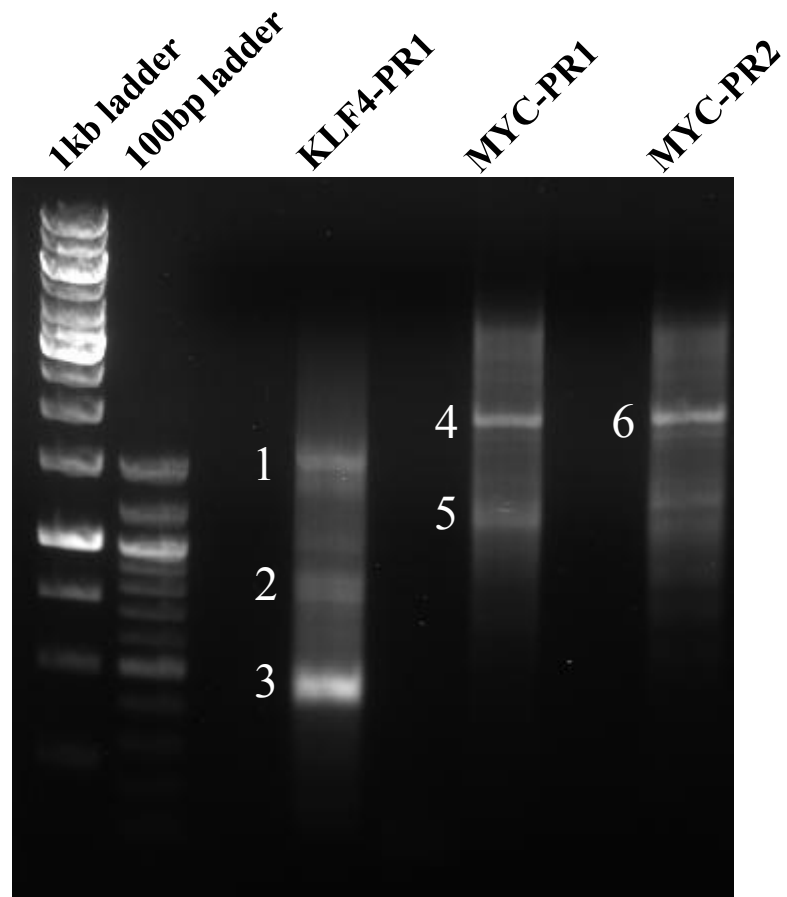

Supplement: mtna201220x5.pdf [file mtna201220x5.pdf]

Figure S6

A

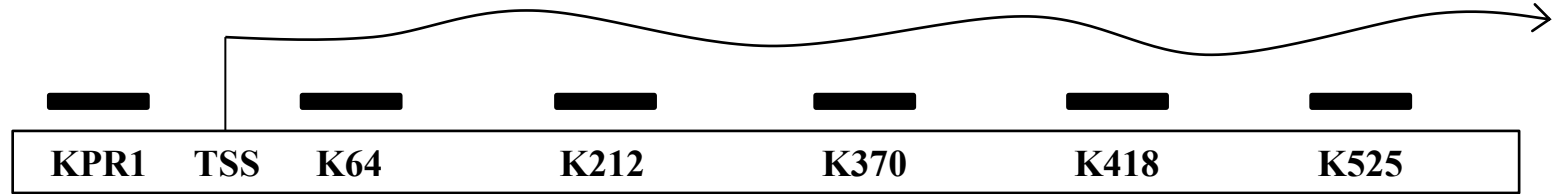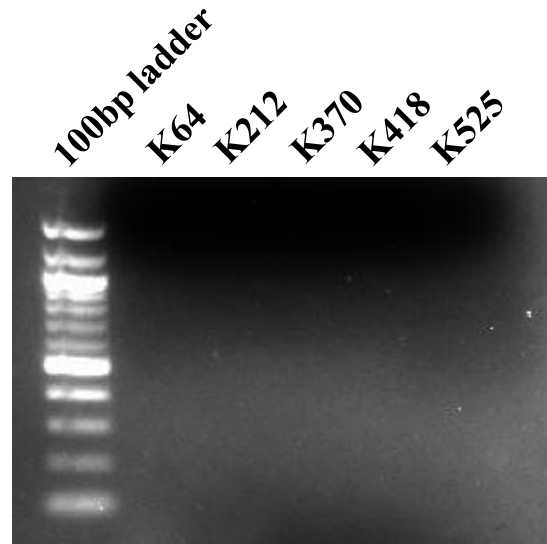

KPR1-primed cDNA

# B

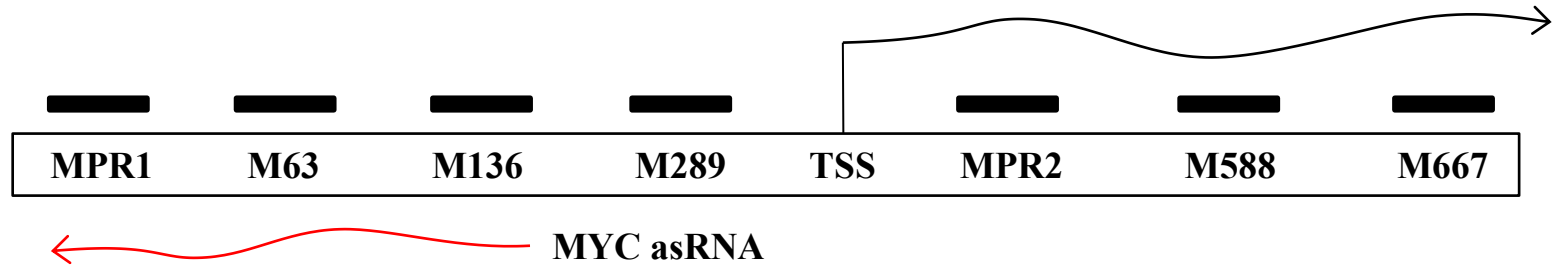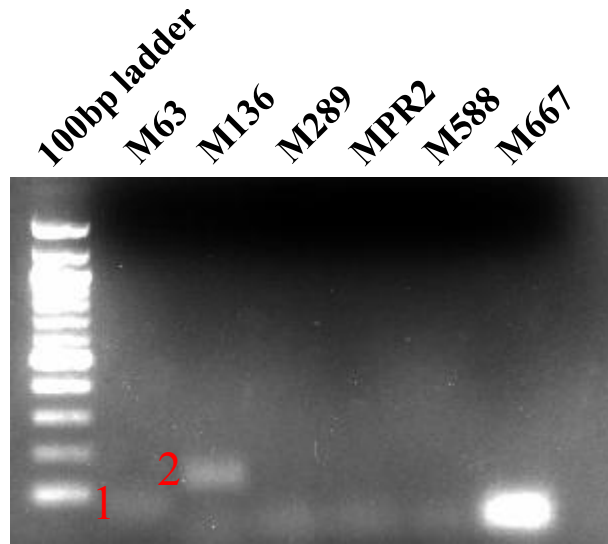

MPR1-primed cDNA

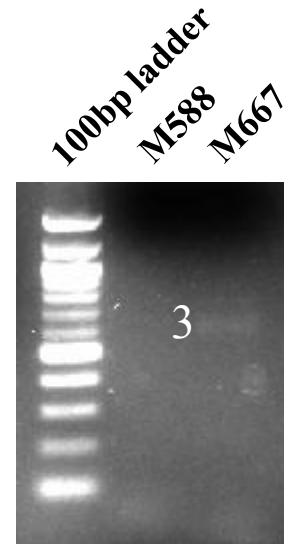

MPR2-primed cDNA

C

### RT-qPCR for c-MYC antisense RNA

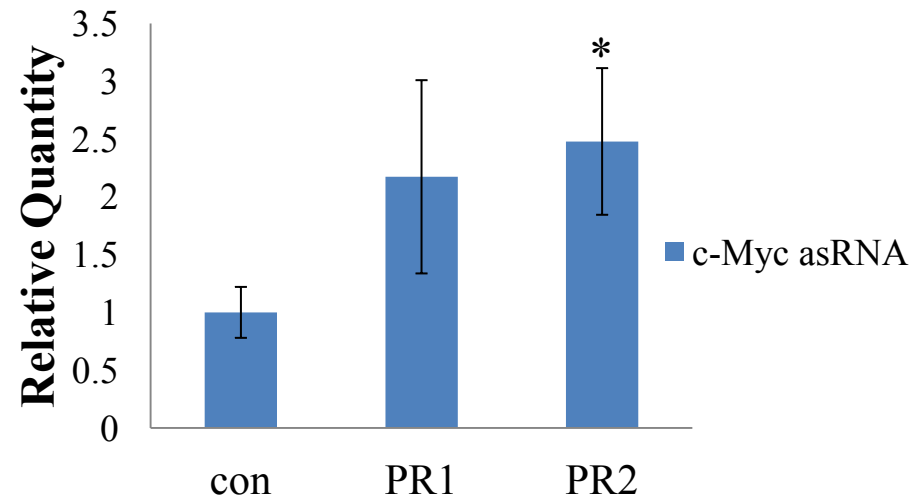

Supplement: mtna201220x6.pdf [file mtna201220x6.pdf]
